# Supplementary material for: Multiphoton-gated cycloreversion reactions of photochromic diarylethene derivatives with low reaction yields upon one-photon visible excitation
Source: Royal Society of Chemistry journal article supplement (doi:10.1039/b9pp00116f), 2010-01-07
Supplement: b9pp00116f.pdf [file b9pp00116f.pdf]

*Supporting Information for*

**Multiphoton-Gated Cycloreversion Reactions of Photochromic Diarylethene Derivatives with Low Reaction Yields upon One-photon Visible Excitation.**

Yukihide Ishibashi<sup>1,2</sup>, Katsuki Okuno<sup>1</sup>, Chikashi Ota<sup>1</sup>, Toshiyuki Umesato<sup>1</sup>, Tetsuro Katayama<sup>1</sup>, Masataka Murakami<sup>1</sup>, Seiya Kobatake<sup>3</sup>, Masahiro Irie<sup>4,\*</sup>, and Hiroshi Miyasaka<sup>1,2,\*</sup>

<sup>1</sup>Division of Frontier Materials Science, Graduate School of Engineering Science, Center for Quantum Science and Technology under Extreme Conditions, Osaka University, and <sup>2</sup>CREST, JST, Toyonaka, Osaka 560-8531, Japan

<sup>3</sup>Department of Applied Chemistry, Graduate School of Engineering, Osaka City University, Sumiyoshi, Osaka 558-8585, Japan

<sup>4</sup>Department of Chemistry, School of Science, Rikkyo University, Nishi-Ikebukuro, Toshima, Tokyo 171-8501 Japan

\*Corresponding authors:

E-mail: iriem@rikkyo.ac.jp; miyasaka@chem.es.osaka-u.ac.jp

Phone & Fax: +81-3-3985-2397; +81-6-6850-6241 (HM)

## 1. Excitation intensity dependence of time profiles under the femtosecond laser excitation

In order to clarify non-linear absorption process under femtosecond laser excitation, we measured the excitation intensity dependence of time profiles of the bleaching signal.

Figure S1 shows the time profiles of the bleaching signals in three diarylethene derivatives (upper panel; PT1(c), middle; PT2(c), bottom; PT3(c)) Excitation intensities were 0.5, 1.0, 1.5 and 2.0  $\mu\text{J}/\text{pulse}$ , respectively, and all signals were normalized at time 0. As clearly shown in Fig. S1, no remarkable change of dynamic behavior (time constants, preexponential factors, and negative constant values) was observed with increasing in excitation intensity, although the S/N ratio decreased with an decrease in the excitation intensity. From these results, it was concluded that non-linear absorption process could not occur under our femtosecond laser excitation conditions.

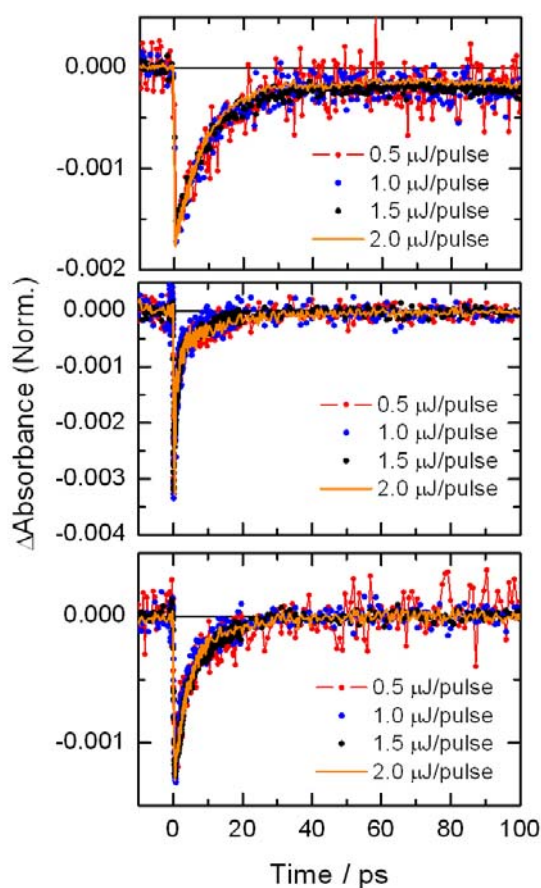

Figure S1. The time profiles of the bleaching signals in three diarylethene derivatives (upper; **PT1(c)**, middle; **PT2(c)**, bottom; **PT3(c)**) in n-hexane solution. Each excitation/monitoring wavelengths is 565/540 nm for **PT1(c)**, 590/605 nm for **PT2(c)**, and 590/600 nm **PT3(c)**. Excitation intensities are 0.5, 1.0, 1.5, and 2.0  $\mu\text{J}/\text{pulse}$
